# Supplementary material for: Facile synthesis of uniform magnetic graphitic carbon for an efficient adsorption of pentachlorophenol
Source: Royal Society of Chemistry journal article supplement (doi:10.1039/c7ra03535g), 2017-01-01
Supplement: c7ra03535g1.pdf [file c7ra03535g1.pdf]

# Facile synthesis of uniform magnetic graphitic carbon for an efficient adsorption of pentachlorophenol

Pengpeng Qiu<sup>a</sup>, Dingyun Cui<sup>b</sup> and Jeehyeong Khim

<sup>a</sup>Department of Civil, Environmental and Architectural Engineering, Korea University, Seoul 136-701, Republic of Korea

<sup>b</sup>Yeongdeok high school, 334 Meyong-ro, Yeongtong-gu, Suwon-si, Gyeonggi-do, Republic of Korea

## Experimental Section

### Materials

FeCl<sub>3</sub>·6H<sub>2</sub>O, trisodium citrate, ethylene glycol, sodium acetate, tetraethyl orthosilicate (TEOS), ethanol, resorcinol, formaldehyde, concentrated ammonia solution (28 wt%), RhB, PCP, BPA were of analytical grade and purchased from Sigma-Aldrich (USA). All chemicals were used as received without further purification. Millipore water was used for all experiments.

### Synthesis of Fe<sub>3</sub>O<sub>4</sub> nanoparticles.

The water-dispersible Fe<sub>3</sub>O<sub>4</sub> nanoparticles were synthesized *via* a solvothermal method reported previously.<sup>31</sup> Briefly, FeCl<sub>3</sub>·6H<sub>2</sub>O (3.25 g), trisodium citrate (1.3 g), and sodium acetate (NaAc, 6.0 g) were dissolved in ethylene glycol (100 mL) with magnetic stirring. Afterwards, the obtained yellow solution was transferred and sealed into a Teflon-lined stainless-steel autoclave (100 mL in capacity). The autoclave was heated at 200 °C for 10 h, and then allowed to cool to room temperature. The black products were washed with deionized water and ethanol for 3 times, respectively.

### **Synthesis of core-shell $\text{Fe}_3\text{O}_4@\text{SiO}_2$ nanospheres.**

The core-shell  $\text{Fe}_3\text{O}_4@\text{SiO}_2$  nanospheres were prepared through a versatile Stöber sol-gel method. For a typical synthesis, an ethanol dispersion of the  $\text{Fe}_3\text{O}_4$  magnetite particles obtained above (3.0 mL, 0.05 g/mL) was added to a three-neck round-bottom flask with ethanol (280 mL), deionized water (70 mL) and concentrated ammonia solution (4.0 mL, 28 wt%). The mixed solution was sonicated for 15 min. Then, 2.0 mL of TEOS was added dropwise in 10 min, and the reaction was allowed to proceed for 10 h at room temperature under continuous mechanical stirring. The resultant products (denoted as  $\text{Fe}_3\text{O}_4@\text{SiO}_2$ ) were separated and collected with a magnet, followed by washing with deionized water and ethanol for 3 times, respectively.

### **Synthesis of $\text{Fe}_3\text{O}_4@\text{SiO}_2@\text{g-C}$**

The uniform carbon shells were prepared via a modified Stöber method. Typically, the core-shell  $\text{Fe}_3\text{O}_4@\text{SiO}_2$  nanospheres were dispersed in ethanol (20 mL), water (10 mL), and mixed with concentrated ammonia solution (0.50 mL, 28 wt%) under ultrasound for 15 min. Into the resultant dispersion, resorcinol (0.2 g) and formaldehyde (0.2 g) were added consecutively, and the mixed dispersion was mechanically stirred for 2 h at 45 °C. After polymerization, the magnetite  $\text{Fe}_3\text{O}_4@\text{SiO}_2$  particles could be uniformly coated by a layer of RF resin, and the obtained core-shell  $\text{Fe}_3\text{O}_4@\text{SiO}_2@\text{RF}$  microspheres were collected by a magnet and washed with deionized water and ethanol three times, respectively. Then, the sample was carbonized at 850 °C under the protection of  $\text{N}_2$  for 3 h.

For comparison,  $\text{Fe}_3\text{O}_4@\text{C-450}$  and  $\text{Fe}_3\text{O}_4@\text{g-C}$  core-shell nanospheres were synthesized through directly coating the carbon shell on  $\text{Fe}_3\text{O}_4$  cores and carbonized at 450 and 850 °C, respectively.

### **Materials characterization.**

X-ray diffraction (XRD) patterns were recorded on a Bruker D8X-ray diffractometer with Ni-filtered Cu K $\alpha$  radiation (40 kV, 40 mA) and a scanning time of 1 min/degree. X-ray photoelectron spectroscopy (XPS) experiments were carried out on a PHI-5000 VersaProbe<sup>TM</sup> ULVAC system (Japan) with Al K monochromatic radiation ( $h\nu = 1486.6$  eV). Raman and FTIR spectra were recorded on a combined Raman FT-IR spectrometer (LabRam ARAMIS IR2) with the excitation of a 532 nm laser. Nitrogen sorption isotherms were measured at 77 K with a Micromeritics Tristar 3020 analyzer (USA). Prior to measurements, the samples were degassed in a vacuum at 180 °C for 6 h. The Brunauer-Emmett-Teller (BET) method was utilized to calculate the specific surface areas using adsorption data in the relative pressure range  $P/P_0 = 0.04 - 0.3$ . Transmission electron microscopy (TEM) was carried out on a JEOL 2011 microscope (Japan) operated at 200 kV. For TEM measurements, the sample was suspended in ethanol and supported on a holey carbon film on a Cu grid. The magnetization was measured using a Vibrating Sample Magnetometer (EV9 including auto-matic sample rotation, Microsense, Japan) under a magnetic field of 10 KOe and a temperature of 24 °C.

### **Adsorption test**

The reactor consisted of a double-layered cylindrical container with a capacity of 1.25 L ( $\Phi$  10.0  $\times$  6 cm). The solution temperature was measured using a thermometer (Tecpel DTM-318) and maintained with a water jacket. Aqueous suspensions (100 mL) of PCP (5 mg L<sup>-1</sup>) and adsorbent (50 mg L<sup>-1</sup>) were used for the adsorption test. A mechanical stirrer was applied for mixing the solution and adsorbent with a speed of 300 rpm. At given time intervals, 0.5 mL of the suspension was removed using a 2-mL syringe and filtered by a membrane with a pore size of

~ 0.45  $\mu\text{m}$ . The PCP concentration in the resultant filtrate was analyzed on a High-performance Liquid Chromatography (HPLC, Agilent 1260) with a ZORBAX Eclipse Plus C18 column (4.6 $\times$ 100 mm, 5  $\mu\text{m}$ ) and a diode array UV detector (G4212B 1260 DAD,  $\lambda = 222 \text{ nm}$ ). For carrying out the recycle test, the adsorbent was collected by applying a magnetic field (10000 Oe) after each cycle and washed 3 times by using ethanol and deionized water, respectively.

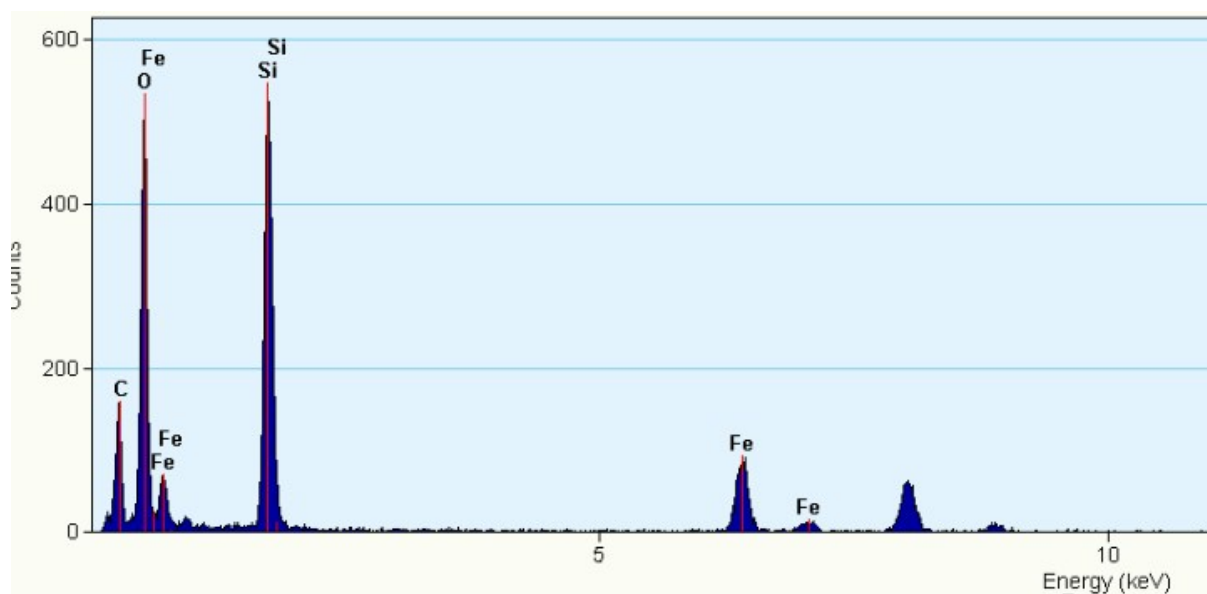

**Fig. S1.** EDX analysis of magnetic g-C

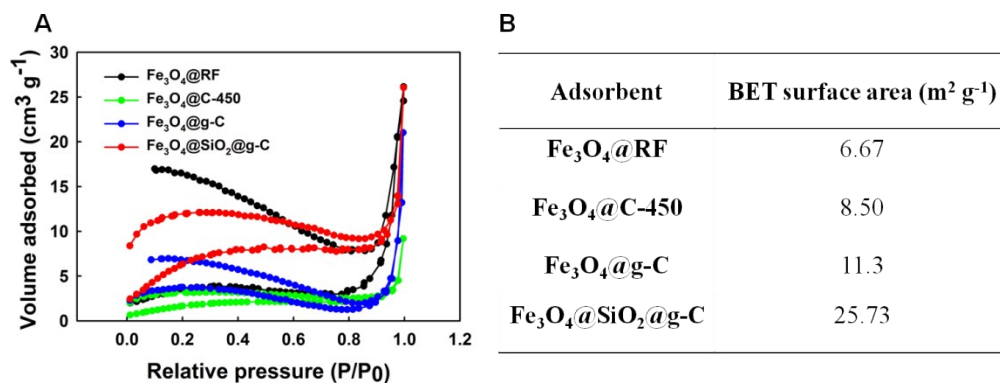

**Fig. S2.** N<sub>2</sub> sorption isothermals (A) and summary table for the BET surface areas calculated at relative pressure  $0.05 < P/P_0 < 0.3$ .

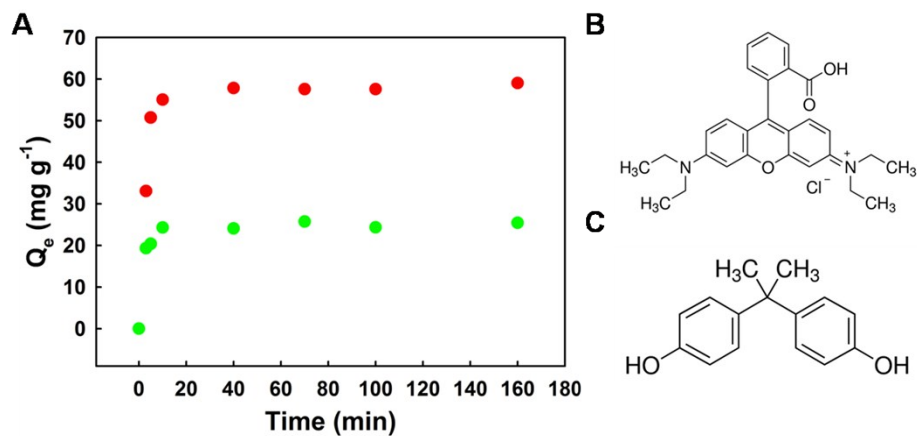

**Fig. S3.** The adsorption profiles for RhB and BPA pollutants (A) and the molecule structures of RhB (B) and BPA (C).

**Table S1.** The comparison of the adsorption capacity between the previous literature and this study for the adsorption of PCP.

| Adsorbent                                                | T (°C) | pH  | Adsorption capacity (mg g <sup>-1</sup> ) | BET surface area (m <sup>2</sup> g <sup>-1</sup> ) | Normalized adsorption capacity (mg m <sup>-2</sup> ) | Ref.       |
|----------------------------------------------------------|--------|-----|-------------------------------------------|----------------------------------------------------|------------------------------------------------------|------------|
| Magnetic biochar                                         | 25     | 7.0 | 48.0                                      | 67                                                 | 0.72                                                 | [1]        |
| Fe <sub>3</sub> O <sub>4</sub> @SiO <sub>2</sub> -MWCNTs | 25     | 6.8 | 35.3                                      | -                                                  | -                                                    | [2]        |
| Ni-ZVI magnetic biochar                                  | 25     | 3-9 | 40-50                                     | 167.86                                             | 0.24-0.30                                            | [3]        |
| Fe <sub>3</sub> O <sub>4</sub> /C                        | 25     | 5   | 0.005                                     | -                                                  | -                                                    | [4]        |
| Fe <sub>3</sub> O <sub>4</sub> @SiO <sub>2</sub> @g-C    | 15     | 6.8 | 58.0                                      | 25.73                                              | 2.30                                                 | This study |

## References

- [1] P. Devi, A.K. Saroha, Synthesis of the magnetic biochar composites for use as an adsorbent for the removal of pentachlorophenol from the effluent, *Bioresour. Technol.*, 169 (2014) 525-531.
- [2] L. Zhou, S. Pan, X. Chen, Y. Zhao, B. Zou, M. Jin, Kinetics and thermodynamics studies of pentachlorophenol adsorption on covalently functionalized Fe<sub>3</sub>O<sub>4</sub>@SiO<sub>2</sub>-MWCNTs core-shell magnetic microspheres, *Chemical Engineering Journal*, 257 (2014) 10-19.
- [3] P. Devi, A.K. Saroha, Simultaneous adsorption and dechlorination of pentachlorophenol from effluent by Ni-ZVI magnetic biochar composites synthesized from paper mill sludge, *Chemical Engineering Journal*, 271 (2015) 195-203.

[4] J. Yang, J.-y. Li, J.-q. Qiao, S.-h. Cui, H.-z. Lian, H.-y. Chen, Magnetic solid phase extraction of brominated flame retardants and pentachlorophenol from environmental waters with carbon doped Fe<sub>3</sub>O<sub>4</sub> nanoparticles, *Appl. Surf. Sci.*, 321 (2014) 126-135.
